# Supplementary material for: Comparative Study of the Adsorption of Acid Blue 40 on Polyaniline, Magnetic Oxide and Their Composites: Synthesis, Characterization and Application
Source: PubMed Central journal article supplement (PMC6765991; doi:10.3390/ma12182854), 2019-09-04
Supplement: materials-12-02854-s001.pdf [file materials-12-02854-s001.pdf]

## Supplementary Materials

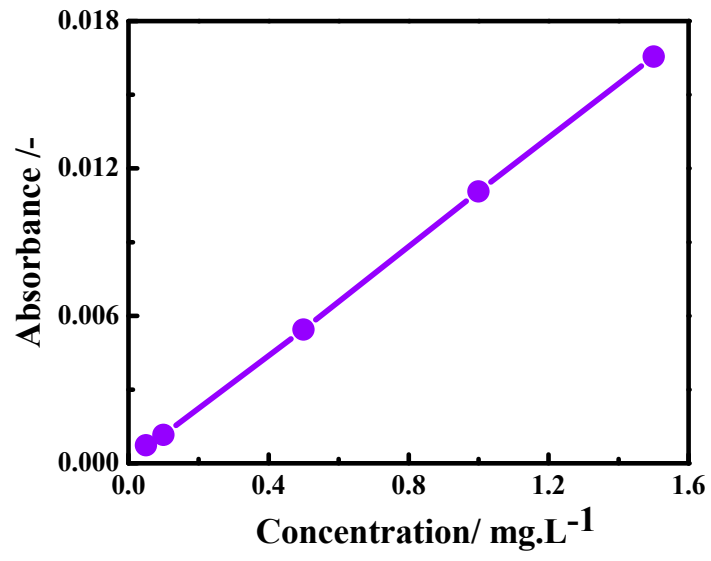

Figure S1. UV-Visible calibration curve of AB40.
